# Supplementary material for: Synaptogenic gene therapy with FGF22 improves circuit plasticity and functional recovery following spinal cord injury
Source: PubMed Central journal article supplement (PMC9906383; doi:10.15252/emmm.202216111), 2023-01-05
Supplement: EMMM-15-e16111-s001.pdf [file EMMM-15-e16111-s001.pdf]

## Expanded View Figures



**Figure EV1. Testing viral constructs in primary cortical neurons.**

A, B Illustration of plasmid construct and double inverted cre-lox system for conditional FGF22 overexpression.

C qPCR quantification of *Fgf22* overexpression in cultured HEK cells ( $n = 3$  replicates per condition). Data are expressed as mean  $\pm$  SEM.

D Representative confocal images of *in vitro* cortical neurons from vGlut2-cre mice (green) infected with (left) rAAV-hSyn-DIO-EGFP and (right) with rAAV-hSyn-DIO-FGF22-EGFP. Scale bar equals 20  $\mu$ m.



**Figure EV2. FGF22 triggers motoneuron survival when delivered to vGlut-cre mice.**

- A Representative confocal images of ChAT-based motoneuron immunostaining (red).
- B Quantification of motoneuron survival following FGF22 overexpression in excitatory neurons and LPSN (right) (4–8 mice per group; green: unlesioned mice; gray: lesioned mice treated with control virus and magenta: lesioned mice treated with FGF22 virus).
- C (Left) Representative confocal images of motoneurons (red: ChAT staining and white: Neurotrace 435) and vGlut staining (yellow). (Right) 3D surface rendered in Imaris Software, showing quantification of vGlut puncta on a motor neuron.
- D Quantification of vGlut spots onto motoneurons, normalized to neuron surface area in LPSN experiment. Results are represented as percentage of control ( $n = 5–8$  animals per group).
- E Quantification of vGlut projections onto motoneurons. Results are represented as percentage of control ( $n = 4–5$  per group).

Data information:  $*P < 0.05$  and  $**P < 0.01$ . Unpaired  $t$ -test for panel (B) (unlesioned vs. control) and Mann–Whitney test for panel (B) (control vs. FGF22). Unpaired  $t$ -test for panel (B) (LPSN experiment) and panels (D) and (E). Scale bar for (A) equals  $50 \mu\text{m}$  and for (C) left  $30 \mu\text{m}$  and for (C) right  $5 \mu\text{m}$ . Arrowheads in (A) represent ChAT<sup>+</sup> motoneurons. Arrowheads in (C) represent vGlut contact onto motoneuron. Data are expressed as mean  $\pm$  SEM.



**Figure EV3. Design and validation of plasmid used for testing therapeutic potentials.**

- A Illustration of plasmid construct used for therapeutic treatment.
- B Representative images of plasmids tested in HEK cells.
- C Representative confocal images of long propriospinal neuron retrogradely labeled with FluoroGold (blue), FGF22 overexpression (green) and CST collateral (white) contacting FGF22 overexpressing neuron.

Data information: Scale bar in (B) equals  $\sim 30 \mu\text{m}$  and (C) equals  $5 \mu\text{m}$ .
